# Supplementary material for: Renal hyperfiltration is independently associated with increased all-cause mortality in individuals with type 2 diabetes: a prospective cohort study
Source: PubMed Central journal article supplement — BMJ Open Diabetes Res Care. 2020 Jul 14;8(1):e001481. doi: 10.1136/bmjdrc-2020-001481 (PMC7365485; doi:10.1136/bmjdrc-2020-001481), 2020-07-14
Supplement: bmjdrc-2020-001481supp001.pdf [file bmjdrc-2020-001481supp001.pdf]

**The RIACE Study Group****The RIACE Steering Committee**

Giuseppe Pugliese (Coordinator), Giuseppe Penno (Secretary), Anna Solini, Enzo Bonora, Emanuela Orsi, Roberto Trevisan, Luigi Laviola, Antonio Nicolucci.

**Participating Diabetes Centres**

1. Azienda Ospedaliera Sant'Andrea, Roma (Coordinating Centre): Giuseppe Pugliese, Lucilla Bollanti, Elena Alessi, Martina Vitale, and Tiziana Cirrito.
2. Ospedale Le Molinette, Torino: Paolo Cavallo-Perin, Gabriella Gruden, and Bartolomeo Lorenzati.
3. Ospedale San Luigi Gonzaga, Orbassano: Franco Cavalot, Mariella Trovati, Leonardo Di Martino, and Fabio Mazzaglia.
4. Ospedale San Raffaele, Milano: Giampaolo Zerbini, Valentina Martina, Silvia Maestroni, and Valentina Capuano.
5. IRCCS "Cà Granda – Ospedale Maggiore Policlinico", Milano: Emanuela Orsi, Eva Palmieri, Elena Lunati, Valeria Grancini, and Veronica Resi.
6. Ospedale San Paolo, Milano: Antonio Pontiroli, Annamaria Veronelli, and Barbara Zecchini.
7. Ospedale San Giuseppe, Milano: Maura Arosio, Laura Montefusco, Antonio Rossi, and Guido Adda.
8. ASST - Ospedale Papa Giovanni XXIII, Bergamo: Roberto Trevisan, Anna Corsi, and Mascia Albizzi.
9. Ospedale Maggiore, Verona: Enzo Bonora, and Giacomo Zoppini.
10. Policlinico Universitario, Padova: Angelo Avogaro, and Monica Vedovato.
11. Ospedale Cisanello, Azienda Ospedaliero-Universitaria Pisana, Pisa: Giuseppe Penno, Laura Pucci, Daniela Lucchesi, Eleonora Russo, and Monia Garofolo.
12. Ospedale Santa Chiara, Azienda Ospedaliero-Universitaria Pisana, Pisa: Anna Solini.
13. Ospedale Le Scotte, Siena: Francesco Dotta, Cecilia Fondelli, and Laura Nigi.
14. Policlinico Umberto I, Roma: Susanna Morano, Tiziana Filardi, Irene Turinese, and Marco Rossetti.
15. Ospedale S. Maria Goretti, Latina: Raffaella Buzzetti and Chiara Foffi.

16. Ospedali Riuniti, Foggia: Mauro Cignarelli, Olga Lamacchia, Sabina Pinnelli, and Lucia Monaco.
17. Policlinico Universitario, Bari: Francesco Giorgino, Luigi Laviola, and Annalisa Natalicchio.
18. Policlinico Mater Domini, Catanzaro: Giorgio Sesti and Francesco Andreozzi.
19. Policlinico Monserrato, Cagliari: Marco Giorgio Baroni, Giuseppina Frau, and Alessandra Boi.

**Table S1.** Stratification of RIACE participants by eGFR.

| Criterion                   | Method                                                                                                                                        | Groups                                                                                                                                                                                                                                                                                                                                                                                                                                                                                       |
|-----------------------------|-----------------------------------------------------------------------------------------------------------------------------------------------|----------------------------------------------------------------------------------------------------------------------------------------------------------------------------------------------------------------------------------------------------------------------------------------------------------------------------------------------------------------------------------------------------------------------------------------------------------------------------------------------|
| By absolute eGFR levels     | eGFR deciles                                                                                                                                  | from the highest (decile 1) to the lowest (decile 10) eGFR category                                                                                                                                                                                                                                                                                                                                                                                                                          |
|                             | KDIGO eGFR categories and subcategories                                                                                                       | G1a ( $\geq 105 \text{ mL}\cdot\text{min}^{-1}\cdot 1.73 \text{ m}^{-2}$ )<br>G1b ( $90\text{-}104 \text{ mL}\cdot\text{min}^{-1}\cdot 1.73 \text{ m}^{-2}$ )<br>G2 ( $60\text{-}89 \text{ mL}\cdot\text{min}^{-1}\cdot 1.73 \text{ m}^{-2}$ )<br>G3a ( $45\text{-}59 \text{ mL}\cdot\text{min}^{-1}\cdot 1.73 \text{ m}^{-2}$ )<br>G3b ( $30\text{-}44 \text{ mL}\cdot\text{min}^{-1}\cdot 1.73 \text{ m}^{-2}$ )<br>G4-5 ( $<30 \text{ mL}\cdot\text{min}^{-1}\cdot 1.73 \text{ m}^{-2}$ ) |
| By adjusted eGFR thresholds | Corrected by age according to the formula: $130 \text{ mL}\cdot\text{min}^{-1}\cdot 1.73 \text{ m}^{-2} - 1.0$ per year after 40 years of age | 1. hyperfiltering: above the threshold<br>2. hypofiltering: below $60 \text{ mL}\cdot\text{min}^{-1}\cdot 1.73 \text{ m}^{-2}$<br>3. normofiltering: in between                                                                                                                                                                                                                                                                                                                              |
|                             | Based on the 95 <sup>th</sup> and 5 <sup>th</sup> age- and gender specific percentiles                                                        | 1. hyperfiltering: above the 95 <sup>th</sup> percentile<br>2. hypofiltering: below the 5 <sup>th</sup> percentile<br>3. normofiltering: in between                                                                                                                                                                                                                                                                                                                                          |

eGFR = estimated glomerular filtration rate; KDIGO = Kidney Disease: Improving Global Outcomes.

**Table S2.** Baseline clinical features in the RIACE participants with valid information on vital status on October 31 2015, stratified by eGFR KDIGO categories and subcategories.

| Variable                        | eGFR KDIGO categories and subcategories |                          |                         |                         |                         |                        | P       |
|---------------------------------|-----------------------------------------|--------------------------|-------------------------|-------------------------|-------------------------|------------------------|---------|
|                                 | 1a                                      | 1b                       | 2                       | 3a                      | 3b                      | 4-5                    |         |
| n (%)                           | 1.344 (8.6)                             | 4.432 (28.3)             | 7.174 (45.8)            | 1.667 (10.6)            | 760 (4.9)               | 279 (1.8)              |         |
| eGFR, mL/min/1.73m <sup>2</sup> | 112.7±7.8<br>(105.0-176.0)              | 96.5±4.2<br>(90.0-104.9) | 77.1±8.5<br>(60.0-89.9) | 53.3±4.2<br>(45.0-59.9) | 38.4±4.3<br>(30.0-44.9) | 22.6±6.0<br>(4.1-29.9) |         |
| Deaths, n (%)                   | 127 (9.4)                               | 549 (12.4)               | 1,653 (23.0)            | 652 (39.1)              | 434 (57.1)              | 187 (67.0)             | <0.0001 |
| Age, years                      | 52.2±9.3                                | 62.2±7.7                 | 69.3±8.6                | 73.5±8.4                | 74.4±8.7                | 74.3±9.0               | <0.0001 |
| Gender, n (%)                   |                                         |                          |                         |                         |                         |                        | <0.0001 |
| Females                         | 574 (42.7)                              | 1,838 (41.5)             | 2,989 (41.7)            | 823 (49.4)              | 389 (51.2)              | 141 (50.5)             |         |
| Males                           | 770 (57.3)                              | 2,594 (58.5)             | 4,185 (58.3)            | 844 (50.6)              | 371 (48.8)              | 138 (49.5)             |         |
| Smoking status, n (%)           |                                         |                          |                         |                         |                         |                        | <0.0001 |
| Never                           | 704 (52.4)                              | 2,450 (55.3)             | 4,105 (57.2)            | 978 (58.7)              | 451 (59.3)              | 161 (57.7)             |         |
| Former                          | 283 (21.1)                              | 1,159 (26.2)             | 2,128 (29.7)            | 526 (31.6)              | 230 (30.3)              | 81 (29.0)              |         |
| Current                         | 357 (26.6)                              | 823 (18.6)               | 941 (13.1)              | 163 (9.8)               | 79 (10.4)               | 37 (13.3)              |         |
| Diabetes duration, years        | 7.7±7.1                                 | 10.9±8.7                 | 14.1±10.3               | 16.9±11.2               | 17.0±10.7               | 20.0±11.4              | <0.0001 |
| Age at diagnosis, years         | 44.5±9.8                                | 51.3±10.1                | 55.2±11.0               | 56.6±11.8               | 57.4±12.0               | 54.3±12.8              | <0.0001 |
| HbA <sub>1c</sub> , mmol/mol    | 60.9±20.2                               | 58.1±16.0                | 58.5±15.6               | 60.5±16.4               | 61.2±17.8               | 60.2±17.7              | <0.0001 |
| Anti-hyperglycaemic tx, n (%)   |                                         |                          |                         |                         |                         |                        | <0.0001 |
| Lifestyle                       | 229 (17.0)                              | 619 (14.0)               | 1,012 (14.1)            | 168 (10.1)              | 66 (8.7)                | 19 (6.8)               |         |
| Non-insulin                     | 796 (59.2)                              | 2,885 (65.1)             | 4,515 (62.9)            | 944 (56.6)              | 389 (51.2)              | 90 (32.3)              |         |
| Insulin                         | 319 (23.7)                              | 928 (20.9)               | 1,647 (23.0)            | 555 (33.3)              | 305 (40.1)              | 170 (60.9)             |         |
| BMI, kg/m <sup>2</sup>          | 29.9±6.4                                | 29.0±5.2                 | 28.7±4.9                | 28.9±4.9                | 29.2±5.1                | 29.8±5.8               | <0.0001 |
| Waist circumference, cm         | 104.4±12.9                              | 102.6±10.5               | 102.0±9.9               | 102.3±9.9               | 102.8±10.2              | 103.9±11.4             | <0.0001 |
| Triglycerides, mmol/L           | 1.65±1.42                               | 1.52±0.95                | 1.52±0.89               | 1.65±0.93               | 1.91±1.15               | 2.08±1.29              | <0.0001 |
| Total cholesterol, mmol/L       | 4.84±1.04                               | 4.79±0.98                | 4.77±0.96               | 4.76±0.99               | 4.79±1.12               | 4.90±1.17              | 0.038   |
| HDL cholesterol, mmol/L         | 1.26±0.35                               | 1.31±0.35                | 1.31±0.35               | 1.26±0.35               | 1.21±0.37               | 1.20±0.42              | <0.0001 |
| Non-HDL cholesterol, mmol/L     | 3.58±1.01                               | 3.49±0.95                | 3.46±0.93               | 3.51±0.92               | 3.58±1.07               | 3.70±1.09              | <0.0001 |
| LDL cholesterol, mmol/L         | 2.85±0.87                               | 2.80±0.83                | 2.78±0.84               | 2.76±0.84               | 2.73±0.93               | 2.74±0.89              | 0.008   |
| Dyslipidaemia, n (%)            | 1,029 (76.6)                            | 3,631 (81.9)             | 5,936 (82.7)            | 1,402 (84.1)            | 623 (82.0)              | 235 (84.2)             | <0.0001 |
| Lipid-lowering tx, n (%)        | 402 (29.9)                              | 1,945 (43.9)             | 3,414 (47.6)            | 892 (53.5)              | 435 (57.2)              | 150 (53.8)             | <0.0001 |
| Systolic BP, mmHg               | 131.8±16.1                              | 136.8±17.3               | 139.4±18.0              | 139.5±18.9              | 139.3±19.3              | 141.3±20.8             | <0.0001 |

|                                      |              |              |              |              |             |             |         |
|--------------------------------------|--------------|--------------|--------------|--------------|-------------|-------------|---------|
| <b>Diastolic BP, mmHg</b>            | 79.4±9.6     | 79.4±9.2     | 78.7±9.3     | 77.7±9.6     | 77.0±10.1   | 77.6±11.2   | <0.0001 |
| <b>Pulse pressure, mmHg</b>          | 52.4±12.7    | 57.3±14.7    | 60.7±15.7    | 61.8±16.8    | 62.3±17.2   | 63.7±18.0   | <0.0001 |
| <b>Hypertension, n (%)</b>           | 940 (69.9)   | 3,600 (81.2) | 6,359 (88.6) | 1,553 (93.2) | 729 (96.9)  | 269 (96.4)  | <0.0001 |
| <b>Anti-hypertensive tx, n (%)</b>   | 649 (48.3)   | 2,762 (62.3) | 5,275 (73.5) | 1,425 (85.5) | 699 (92.0)  | 262 (93.9)  | <0.0001 |
| <b>RAS blocker tx, n (%)</b>         | 553 (41.1)   | 2,319 (52.3) | 4,437 (61.8) | 1,208 (72.5) | 614 (80.8)  | 209 (74.9)  | <0.0001 |
| <b>Anti-platelet tx, n (%)</b>       | 321 (23.9)   | 1,443 (32.6) | 3,003 (41.9) | 882 (52.9)   | 436 (57.4)  | 163 (58.4)  | <0.0001 |
| <b>Anti-coagulant tx, n (%)</b>      | 11 (0.8)     | 103 (2.3)    | 311 (4.3)    | 135 (8.1)    | 89 (11.7)   | 20 (7.2)    | <0.0001 |
| <b>Albuminuria, mg/24 hours</b>      | 60.0±490.1   | 39.6±178.8   | 52.4±230.0   | 115.4±371.4  | 193.1±419.2 | 578.4±990.6 | <0.0001 |
| <b>Albuminuria categories, n (%)</b> |              |              |              |              |             |             | <0.0001 |
| <b>Normoalbuminuria</b>              | 1,027 (76.4) | 3,537 (79.8) | 5,420 (75.6) | 1,036 (62.1) | 372 (48.9)  | 68 (24.4)   |         |
| <b>Microalbuminuria</b>              | 281 (20.9)   | 791 (17.8)   | 1,527 (21.3) | 504 (30.2)   | 261 (34.3)  | 101 (36.2)  |         |
| <b>Macroalbuminuria</b>              | 36 (2.7)     | 104 (2.3)    | 227 (3.2)    | 127 (7.6)    | 127 (16.7)  | 110 (39.4)  |         |
| <b>Serum creatinine, µmol/L</b>      | 51.7±11.9    | 63.4±10.9    | 80.3±13.1    | 104.7±15.2   | 137.0±22.8  | 233.3±112.8 | <0.0001 |
| <b>DR, n (%)</b>                     |              |              |              |              |             |             | <0.0001 |
| <b>No</b>                            | 1,144 (85.1) | 3,583 (80.8) | 5,618 (78.3) | 1,183 (71.0) | 514 (67.6)  | 147 (52.7)  |         |
| <b>Non-advanced</b>                  | 113 (8.4)    | 488 (11.0)   | 911 (12.7)   | 266 (16.0)   | 114 (15.0)  | 55 (19.7)   |         |
| <b>Advanced</b>                      | 87 (6.5)     | 361 (8.1)    | 645 (9.0)    | 218 (13.1)   | 132 (17.4)  | 77 (27.6)   |         |
| <b>CVD, n (%)</b>                    |              |              |              |              |             |             |         |
| <b>Any</b>                           | 130 (9.7)    | 745 (16.8)   | 1688 (23.5)  | 597 (35.8)   | 329 (43.3)  | 131 (47.0)  | <0.0001 |
| <b>Myocardial infarction</b>         | 63 (4.7)     | 351 (7.9)    | 810 (11.3)   | 287 (17.2)   | 171 (22.5)  | 60 (21.5)   | <0.0001 |
| <b>Coronary revascularization</b>    | 57 (4.2)     | 354 (8.0)    | 718 (10.0)   | 256 (15.4)   | 142 (18.7)  | 52 (18.6)   | <0.0001 |
| <b>Any coronary event</b>            | 80 (6.0)     | 511 (11.5)   | 1105 (15.4)  | 394 (23.6)   | 225 (29.6)  | 81 (29.0)   | <0.0001 |
| <b>Stroke</b>                        | 13 (1.0)     | 86 (1.9)     | 255 (3.6)    | 84 (5.0)     | 51 (6.7)    | 24 (8.6)    | <0.0001 |
| <b>Carotid revascularization</b>     | 15 (1.1)     | 164 (3.7)    | 382 (5.3)    | 172 (10.3)   | 84 (11.1)   | 39 (14.0)   | <0.0001 |
| <b>Any cerebro-vascular event</b>    | 28 (2.1)     | 239 (5.4)    | 602 (8.4)    | 241 (14.5)   | 127 (16.7)  | 55 (19.7)   | <0.0001 |
| <b>Ulcer/gangrene/amputation</b>     | 24 (1.8)     | 89 (2.0)     | 248 (3.5)    | 103 (6.2)    | 62 (8.2)    | 30 (10.8)   | <0.0001 |
| <b>Lower limb revascularization</b>  | 4 (0.3)      | 72 (1.6)     | 204 (2.8)    | 106 (6.4)    | 46 (6.1)    | 18 (6.5)    | <0.0001 |
| <b>Any peripheral event</b>          | 25 (1.9)     | 148 (3.3)    | 399 (5.6)    | 181 (10.9)   | 89 (11.7)   | 41 (14.7)   | <0.0001 |
| <b>Comorbidities, n (%)</b>          |              |              |              |              |             |             |         |
| <b>Any</b>                           | 215 (16.0)   | 718 (16.2)   | 1,250 (17.4) | 350 (21.0)   | 185 (24.3)  | 69 (24.7)   | <0.0001 |
| <b>COPD</b>                          | 56 (4.2)     | 143 (3.2)    | 276 (3.8)    | 115 (6.9)    | 54 (7.1)    | 30 (10.8)   | <0.0001 |
| <b>Chronic liver disease</b>         | 126 (9.4)    | 380 (8.6)    | 594 (8.3)    | 147 (8.8)    | 87 (11.4)   | 27 (9.7)    | 0.074   |
| <b>Cancer</b>                        | 59 (4.4)     | 241 (5.4)    | 510 (7.1)    | 129 (7.7)    | 66 (8.7)    | 26 (9.3)    | <0.0001 |

Values are mean±SD or median (interquartile range) for continuous variables, and number of cases (percentage) for categorical variables. eGFR = estimated glomerular filtration rate; KDIGO = Kidney Disease: Improving Global Outcomes; HbA<sub>1c</sub> = haemoglobin A<sub>1c</sub>; BMI = body mass index; BP = blood pressure; RAS = renin angiotensin system; DR = diabetic retinopathy; CVD = cardiovascular disease; COPD = chronic obstructive pulmonary disease.

**Table S3.** Baseline clinical features in the RIACE participants with valid information on vital status on October 31 2015, stratified by filtration status according to age- and gender-specific 95<sup>th</sup> and 5<sup>th</sup> percentiles.

| Variable                        | Normofiltering            | Hyperfiltering             | Hypofiltering           | P       |
|---------------------------------|---------------------------|----------------------------|-------------------------|---------|
| n (%)                           | 14,108 (90.1)             | 774 (4.9)                  | 774 (4.9)               |         |
| eGFR, mL/min/1.73m <sup>2</sup> | 81.1±17.7<br>(27.8-127.2) | 108.8±12.5<br>(86.4-176.0) | 35.5±13.0<br>(4.1-75.2) |         |
| Deaths, n (%)                   | 3,047 (21.6)              | 176 (22.7)                 | 379 (49.0)              | <0.0001 |
| Age, years                      | 66.6±10.3                 | 64.8±11.0                  | 67.4±10.3               | <0.0001 |
| Gender, n (%)                   |                           |                            |                         | 0.995   |
| Females                         | 6,088 (43.2)              | 333 (43.0)                 | 333 (43.0)              |         |
| Males                           | 8,020 (56.8)              | 441 (57.0)                 | 441 (57.0)              |         |
| Smoking status, n (%)           |                           |                            |                         | 0.013   |
| Never                           | 7,998 (56.7)              | 427 (55.2)                 | 424 (54.8)              |         |
| Former                          | 3,965 (28.1)              | 200 (25.8)                 | 242 (31.3)              |         |
| Current                         | 2,145 (15.2)              | 147 (19.0)                 | 108 (14.0)              |         |
| Diabetes duration, years        | 13.2±10.2                 | 11.2±9.4                   | 15.6±10.7               | <0.0001 |
| Age at diagnosis, years         | 53.5±11.3                 | 53.6±11.8                  | 51.8±12.0               | <0.0001 |
| HbA <sub>1c</sub> , mmol/mol    | 58.8±16.2                 | 59.9±18.7                  | 60.3±18.0               | 0.009   |
| Anti-hyperglycaemic tx, n (%)   |                           |                            |                         | <0.0001 |
| Lifestyle                       | 1,934 (13.7)              | 106 (13.7)                 | 73 (9.4)                |         |
| Non-insulin                     | 8,840 (62.7)              | 482 (62.3)                 | 297 (38.4)              |         |
| Insulin                         | 3,334 (23.6)              | 186 (24.0)                 | 404 (52.2)              |         |
| BMI, kg/m <sup>2</sup>          | 28.9±5.1                  | 29.0±5.8                   | 30.1±5.5                | <0.0001 |
| Waist circumference, cm         | 102.4±10.3                | 102.5±11.9                 | 104.9±11.1              | <0.0001 |
| Triglycerides, mmol/L           | 1.55±0.95                 | 1.55±1.33                  | 2.10±1.31               | <0.0001 |
| Total cholesterol, mmol/L       | 4.78±0.98                 | 4.80±1.06                  | 4.80±1.16               | 0.754   |
| HDL cholesterol, mmol/L         | 1.29±0.35                 | 1.34±0.37                  | 1.17±0.38               | <0.0001 |
| Non-HDL cholesterol, mmol/L     | 3.49±0.94                 | 3.47±1.04                  | 3.63±1.10               | <0.0001 |
| LDL cholesterol, mmol/L         | 2.79±0.84                 | 2.78±0.86                  | 2.69±0.92               | 0.004   |
| Dyslipidaemia, n (%)            | 10,120 (82.2)             | 476 (73.9)                 | 2,260 (83.5)            | <0.0001 |
| Lipid-lowering tx, n (%)        | 5,524 (44.9)              | 237 (36.8)                 | 1,477 (54.6)            | <0.0001 |
| Systolic BP, mmHg               | 138.1±17.9                | 136.0±17.3                 | 138.6±20.2              | 0.004   |
| Diastolic BP, mmHg              | 78.8±9.4                  | 78.3±9.5                   | 77.9±10.3               | 0.006   |
| Pulse pressure, mmHg            | 59.3±15.7                 | 57.7±14.3                  | 60.8±17.6               | 0.001   |
| Hypertension, n (%)             | 12,096 (85.7)             | 621 (80.2)                 | 733 (94.7)              | <0.0001 |
| Anti-hypertensive tx, n (%)     | 9,881 (70.0)              | 491 (63.4)                 | 700 (90.4)              | <0.0001 |
| RAS blocker tx, n (%)           | 8,356 (59.2)              | 403 (52.1)                 | 581 (75.1)              | <0.0001 |
| Anti-platelet tx, n (%)         | 5,545 (39.3)              | 291 (37.6)                 | 412 (53.2)              | <0.0001 |
| Anti-coagulant tx, n (%)        | 583 (4.1)                 | 14 (1.8)                   | 72 (9.3)                | <0.0001 |
| Albuminuria, mg/24 hours        | 57.5±243.7                | 70.2±603.1                 | 345.6±713.2             | <0.0001 |
| Albuminuria categories, n (%)   |                           |                            |                         | <0.0001 |
| Normoalbuminuria                | 10,600 (75.1)             | 557 (72.0)                 | 303 (39.1)              |         |
| Microalbuminuria                | 3,008 (21.3)              | 190 (24.5)                 | 267 (34.5)              |         |
| Macroalbuminuria                | 500 (3.5)                 | 27 (3.5)                   | 204 (26.4)              |         |
| Serum creatinine, µmol/L        | 78.0±19.6                 | 45.1±9.0                   | 173.2±83.6              | <0.0001 |
| DR, n (%)                       |                           |                            |                         | <0.0001 |
| No                              | 11,077 (78.5)             | 638 (82.4)                 | 474 (61.2)              |         |
| Non-advanced                    | 1,750 (12.4)              | 74 (9.6)                   | 123 (15.9)              |         |
| Advanced                        | 1,281 (9.1)               | 62 (8.0)                   | 177 (22.9)              |         |
| CVD, n (%)                      |                           |                            |                         |         |

|                                     |              |            |            |         |
|-------------------------------------|--------------|------------|------------|---------|
| <b>Any</b>                          | 3,172 (22.5) | 124 (16.0) | 324 (41.9) | <0.0001 |
| <b>Myocardial infarction</b>        | 1,514 (10.7) | 66 (8.5)   | 162 (20.9) | <0.0001 |
| <b>Coronary revascularization</b>   | 1,369 (9.7)  | 51 (6.6)   | 159 (20.5) | <0.0001 |
| <b>Any coronary event</b>           | 2,088 (14.8) | 84 (10.9)  | 224 (28.9) | <0.0001 |
| <b>Stroke</b>                       | 443 (3.1)    | 17 (2.2)   | 53 (6.8)   | <0.0001 |
| <b>Carotid revascularization</b>    | 758 (5.4)    | 16 (2.1)   | 82 (10.6)  | <0.0001 |
| <b>Any cerebro-vascular event</b>   | 1,136 (8.1)  | 30 (3.9)   | 126 (16.3) | <0.0001 |
| <b>Ulcer/gangrene/amputation</b>    | 465 (3.3)    | 22 (2.8)   | 69 (8.9)   | <0.0001 |
| <b>Lower limb revascularization</b> | 393 (2.8)    | 6 (0.8)    | 51 (6.6)   | <0.0001 |
| <b>Any peripheral event</b>         | 758 (5.4)    | 25 (3.2)   | 100 (12.9) | <0.0001 |
| <b>Comorbidities, n (%)</b>         |              |            |            |         |
| <b>Any</b>                          | 2,439 (17.3) | 165 (21.3) | 183 (23.6) | <0.0001 |
| <b>COPD</b>                         | 572 (4.1)    | 50 (6.5)   | 52 (6.7)   | <0.0001 |
| <b>Chronic liver disease</b>        | 1,188 (8.4)  | 78 (10.1)  | 95 (12.3)  | <0.0001 |
| <b>Cancer</b>                       | 908 (6.4)    | 59 (7.6)   | 64 (8.3)   | 0.066   |

Values are mean±SD or median (interquartile range) for continuous variables, and number of cases (percentage) for categorical variables. eGFR = estimated glomerular filtration rate; HbA<sub>1c</sub> = haemoglobin A<sub>1c</sub>; BMI = body mass index; BP = blood pressure; RAS = renin angiotensin system; DR = diabetic retinopathy; CVD = cardiovascular disease; COPD = chronic obstructive pulmonary disease.



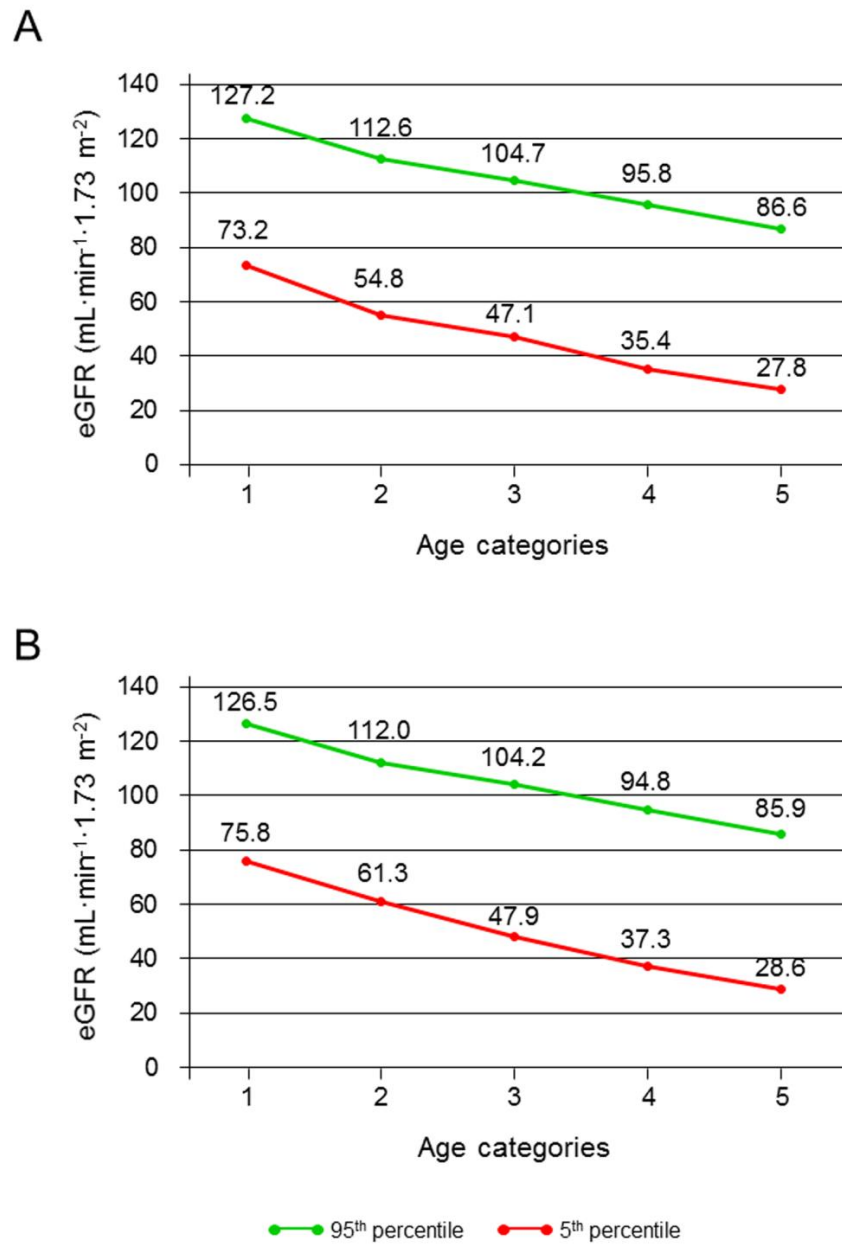

**Figure S1.** Hyperfiltration (95<sup>th</sup> percentile) and hypofiltration (5<sup>th</sup> percentile) eGFR thresholds by age categories in females (A) and males (B). Age categories: 1 = <50 years; 2 = 50-59 years; 3 = 60-69 years; 4 = 70-79 years; 5 = ≥80 years. eGFR = estimated glomerular filtration rate.

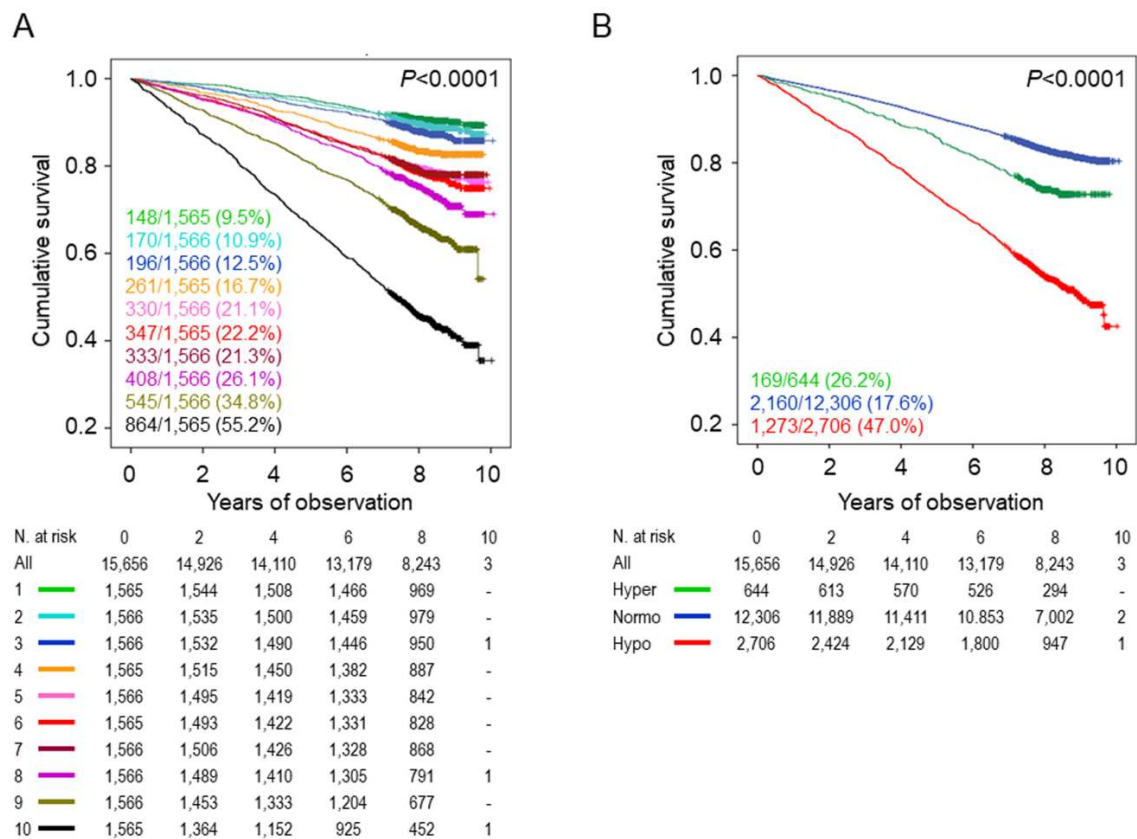

**Figure S2.** Cumulative survival by Kaplan-Meier analysis according to eGFR deciles (A) and age-adjusted filtration status (B). Numbers (percentages) of death are shown for each group. eGFR = estimated glomerular filtration rate.

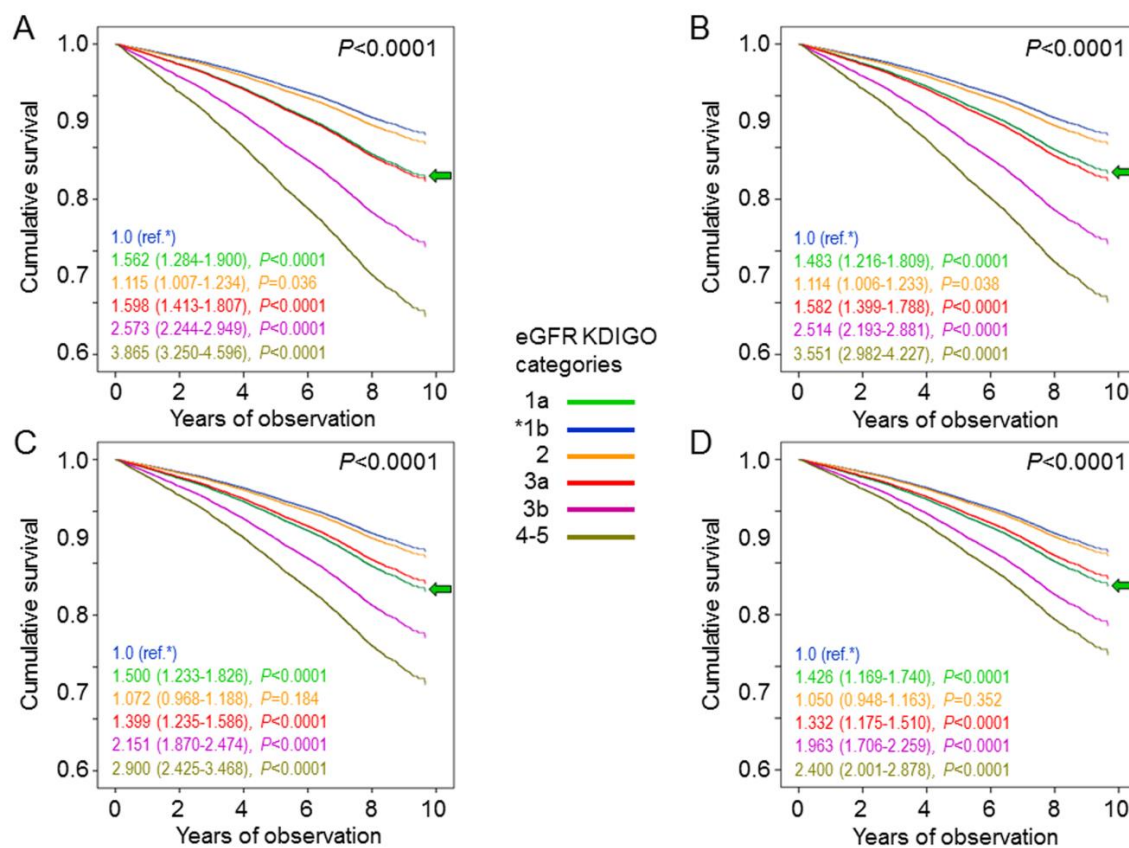

**Figure S3.** Cox proportional hazards regression, adjusted for age and gender (A), plus albuminuria (B), plus CVD risk factors (C) plus complications/comorbidities (D), according to eGFR KDIGO categories and subcategories. HRs (95% CI) for mortality are shown for each group; the green arrow indicates the G1a category. CVD = cardiovascular disease; eGFR = estimated glomerular filtration rate; KDIGO = Kidney Disease: Improving Global Outcomes; HR = hazard ratio; CI = confidence interval.

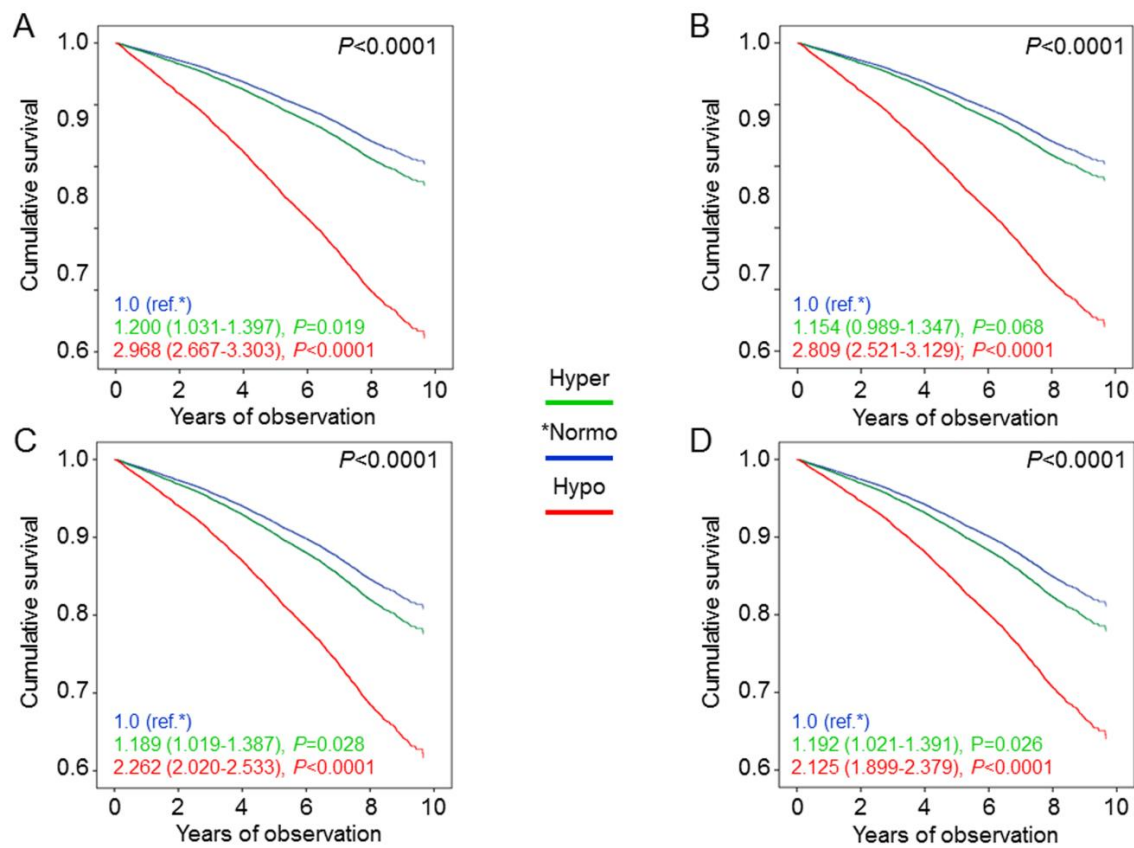

**Figure S4.** Cox proportional hazards regression, adjusted for age and gender (A), plus albuminuria (B), plus CVD risk factors (C) plus complications/comorbidities (D), according to age- and gender-adjusted filtration status. HRs (95% CI) for mortality are shown for each group. CVD = cardiovascular disease; HR = hazard ratio; CI = confidence interval; hyper = hyperfiltering; normo = normofiltering; hypo = hypofiltering.
